# Supplementary material for: Neuroinvasion and Neurotropism by SARS-CoV-2 Variants in the K18-hACE2 Mouse
Source: MDPI journal article supplement (doi:10.3390/v14051020), 2022-05-11
Supplement: s1 [file s1]

## Supplemental Material

**Supplemental Table S1.** Antibodies and detection methods used for immunohistochemistry

| Antigen           | Antibody (clone)                                                                      | Antigen retrieval         | Antibody dilution, detection method                       |
|-------------------|---------------------------------------------------------------------------------------|---------------------------|-----------------------------------------------------------|
| SARS-CoV NP       | pAB rabbit <sup>a</sup>                                                               | CB pH 6.0, 98 °C, 20 min  | 1:6,000, ON, 4 °C<br>EnVision+ (HRP, Rb) <sup>f</sup>     |
| IAV               | goat anti-IAV (H1N1; virions) <sup>b</sup>                                            | TE pH 9.0, 96 °C, 30 min  | 1:200, 60 min, RT<br>Rb anti-goat Ig/HRP <sup>f</sup>     |
| Iba1              | pAB rabbit anti-human Iba1 <sup>c</sup>                                               | CB pH 6.0, 98 °C, 20 min  | 1:750, 60 min, RT<br>HRP EnVision+ (HRP, Rb) <sup>f</sup> |
| CD3               | mAB rabbit anti-mouse CD3 (SP7) <sup>d</sup>                                          | TE pH 9.0, 37 °C, 20 min  | 1:900, 60 min, 37 °C,<br>OmniMap anti-Rb HRP <sup>i</sup> |
| CD45R             | mAB rat anti-mouse CD45R (B220/RA3-6B2) <sup>e</sup>                                  | CB pH 6.0, 98 °C, 20 min  | 1:800, 60 min, RT<br>EnVision+ (HRP, Rat) <sup>f</sup>    |
| GFAP              | pAB rabbit anti-bovine GFAP <sup>f</sup>                                              | CB pH 6.0, 98 °C, 20 min  | 1:600, 10 min, RT<br>MACH4™ HRP <sup>k</sup>              |
| APP               | mAB mouse anti-Alzheimer precursor A4 (pre A4695) fusion protein (22C11) <sup>g</sup> | CB pH 6.0, 98 °C, 20 min  | 1:6,000, 60 min, RT<br>MACH4™ HRP <sup>k</sup>            |
| ACE2              | mAB rabbit anti-human ACE2 (SN0754) <sup>h</sup>                                      | CB pH 6.0, 100 °C, 20 min | 1:200, 10 min, RT<br>EnVision+ (HRP, Rb) <sup>f</sup>     |
| Cleaved caspase 3 | mAB rabbit anti-cleaved caspase 3 (Asp175, 5A1E) <sup>i</sup>                         | TE pH 9.0, 98 °C, 20 min  | 1:200, ON, 4 °C<br>EnVision+ (HRP, Rb) <sup>f</sup>       |

**Legend:** ACE2 - angiotensin-converting enzyme 2, APP - Alzheimer Precursor Protein A4, GFAP – glial fibrillary acidic protein, IAV – Influenza A virus, mAB – monoclonal antibody; pAB – polyclonal antibody; CB – citrate buffer; ON – overnight; RT – room temperature; Rb – rabbit; SARS-CoV NP – severe acute respiratory syndrome coronavirus nucleocapsid protein; TE – Tris-EDTA buffer;

### Commercial providers:

<sup>a</sup>Rockland Immunochemicals Inc., Limerick, USA

<sup>b</sup>Meridian Life Sciences Inc., Memphis, USA

<sup>c</sup>WAKO, Osaka, Japan

<sup>d</sup>Spring Bioscience Corp., Ventana Medical Systems, Tucson, USA

<sup>e</sup>BD Pharmingen, Franklin Lakes, USA

<sup>f</sup>Agilent Dako, Glostrup, Denmark

<sup>g</sup>Merck Millipore

<sup>h</sup>Novus Biologicals, Centennial, USA

<sup>i</sup>Ventana Medical Systems Inc., Tucson, USA

<sup>k</sup>Biocare Medical

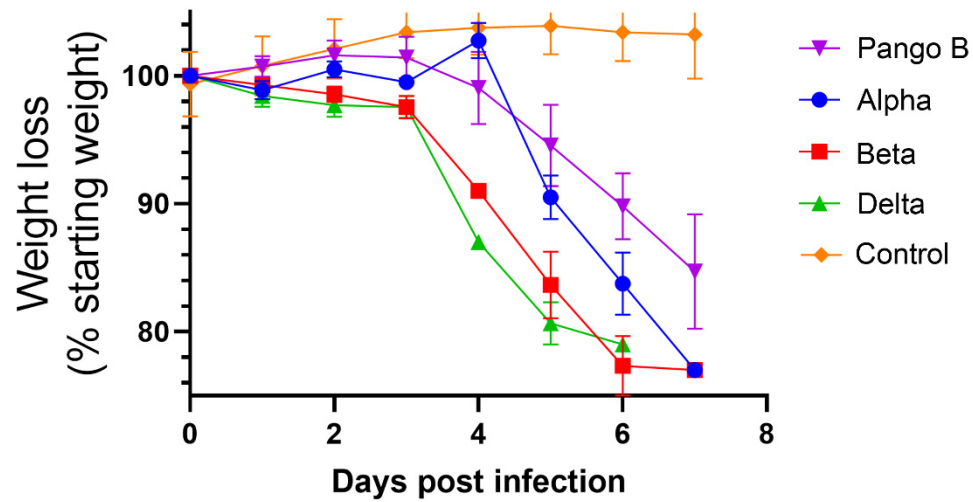

**Figure S1. Infection of K18-hACE2 mice with SARS-CoV-2 VOCs leads to substantial weight loss.** K18-hACE2 mice were infected intranasally with SARS-CoV-2 Alpha, Beta or Delta variant at  $10^3$  PFU (n=4 per group). Mice were monitored for weight loss at indicated time points and euthanized at days 5 and 6 post infection due to substantial weight loss (limit: 20% loss) or at the end of the experiment (day 7). The weights of Pango lineage B infected animals ( $10^4$  PFU) from another experiment served for comparison. Data represent the mean value  $\pm$  SEM.

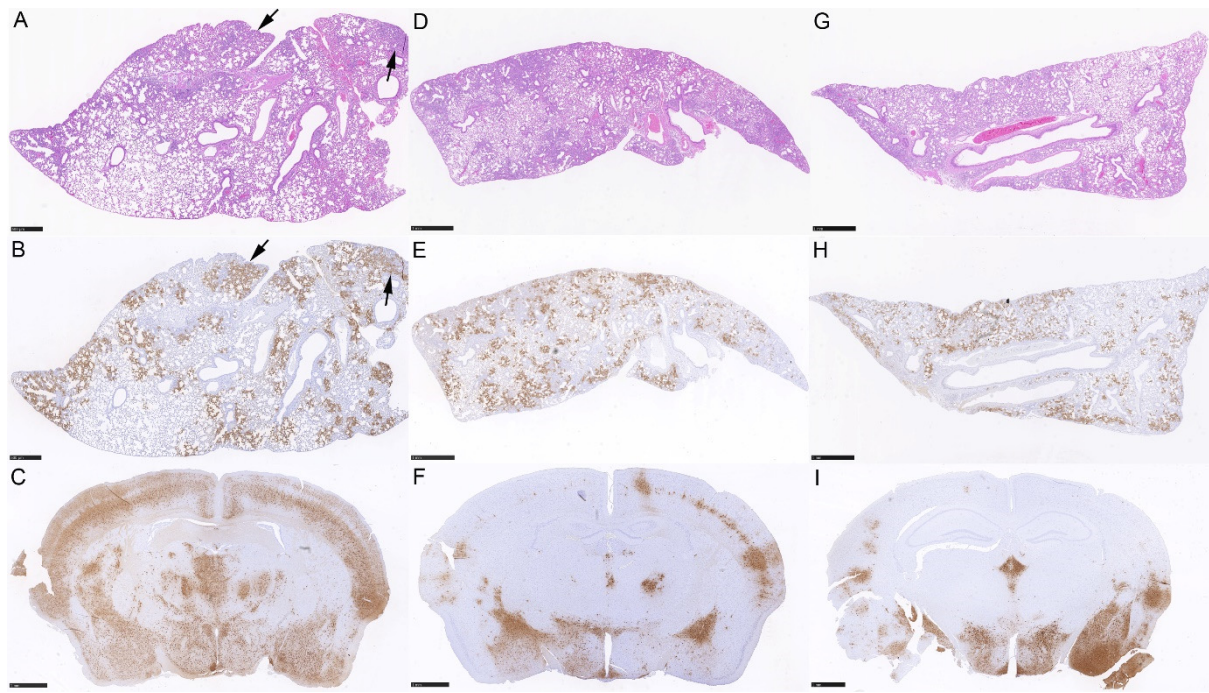

**Figure S2. Infection of K18-hACE2 mice with SARS-CoV-2 VOCs leads to extensive pulmonary infection and spreads to the brain.**

K18-hACE2 mice were infected intranasally with SARS-CoV-2 Alpha, Beta or Delta variant at  $10^3$  PFU and euthanized at 5 or 6 days post infection (dpi) due to substantial weight loss (limit: 20% loss). Lungs and brains, overview. **A-C**) Animal infected with Alpha variant and euthanized at 6 dpi. **A, B**) Lung. **A**) Mild multifocal increase in interstitial cellularity (arrows) with activation of type II pneumocytes and occasional degenerate and sloughed off alveolar epithelial cells. **B**) There is extensive viral antigen expression in large patches of unaltered appearing alveoli and in more cell rich areas (arrows). **C**) Brain, coronal section at level of corpus callosum, caudoputamen, thalamus/hypothalamus and frontal cerebral cortex. There is extensive viral antigen expression in neurons in cerebral cortex, thalamic and hypothalamic nuclei as well as piriform area. **D-F**) Animal infected with Beta variant and euthanized at 6 dpi. **D, E**) Lung. **D**) Mild to moderate multifocal increase in interstitial cellularity with activated type II pneumocytes and degenerate and sloughed off alveolar epithelial cells. **E**) There is extensive disseminated viral antigen expression in large patches of unaltered appearing alveoli and in more cell rich areas. **F**) Brain, coronal section at level of corpus callosum, rostral hippocampus, caudoputamen, thalamus/hypothalamus and frontal cerebral cortex. There is multifocal patchy viral antigen expression in neurons in cerebral cortex, amygdala, thalamic/hypothalamic nuclei, piriform area. **G-I**) Animal infected with Delta variant and euthanized at 5 dpi. **G, H**) Lung. **G**) Mild multifocal increase in interstitial cellularity (arrows) with activation of type II pneumocytes and occasional degenerate and sloughed off alveolar epithelial cells. **H**) There is abundant disseminated viral antigen expression in variably sized patches of unaltered appearing alveoli and in more cell rich areas. **I**) Brain, coronal section at corpus callosum, hippocampus, caudoputamen, thalamus/hypothalamus and frontal cerebral cortex. There is multifocal patchy viral antigen expression in neurons in cerebral cortex, amygdala, thalamic/hypothalamic nuclei, piriform area. HE stain (A, D, G). Immunohistochemistry, hematoxylin counterstain (B, C, E, F, H, I).
